# Supplementary material for: mTORC1 links pathology in experimental models of Still’s disease and macrophage activation syndrome
Source: Springer Nature journal article supplement (doi:10.1038/s41467-022-34480-6), 2022-11-28
Supplement: MOESM1 [file 41467_2022_34480_MOESM1_ESM.pdf]

**Supplementary Table 1. Transcriptomic studies of sJIA and AOSD in GEO repository.** <sup>1-8</sup>

| <b>GEO ID</b> | <b>Pubmed ID</b> | <b>Groups compared (size)</b>                                                       | <b>Source</b> | <b>Technique</b> |
|---------------|------------------|-------------------------------------------------------------------------------------|---------------|------------------|
| GSE80325      | 28935693         | HC (n = 6), sJIA (n = 12)                                                           | whole blood   | microarray       |
| GSE80060      | 28115015         | HC (n = 22), baseline sJIA (n = 77), post-canakinumab (n = 67)                      | whole blood   | microarray       |
| GSE7753       | 17968951         | HC (n = 30), sJIA (n = 17)                                                          | PBMC          | microarray       |
| GSE21521      | 20576155         | HC (n = 59), sJIA (n = 29), other JIA (n = 176)                                     | PBMC          | microarray       |
| GSE17590      | 21173013         | HC (n = 21), sJIA (n = 24)                                                          | PBMC          | microarray       |
| GSE147608     | 33277241         | HC (n = 11), sJIA (n = 26)                                                          | monocytes     | RNAseq           |
| GSE112057     | 29950172         | HC (n = 12), oligoarticular JIA (n = 43), polyarticular JIA (n = 46), sJIA (n = 26) | whole blood   | RNAseq           |
| GSE113645     | 30404814         | HC (n = 3), inactive AOSD (n = 14), active AOSD (n = 10)                            | monocytes     | microarray       |

**Supplementary Table 2. Enrichment of Hallmark mTORC1 gene set in GEO datasets related to Still's disease.**

| <b>Gene set:</b>     | <b>Hallmark<br/>mTORC1 Signaling</b> | <b>Leading edge genes</b>                                                                                                                                                                                                                                                                                                                                                                                                                                                                                                   |
|----------------------|--------------------------------------|-----------------------------------------------------------------------------------------------------------------------------------------------------------------------------------------------------------------------------------------------------------------------------------------------------------------------------------------------------------------------------------------------------------------------------------------------------------------------------------------------------------------------------|
| <b>GEO study ID</b>  | <b>GSE80060</b>                      |                                                                                                                                                                                                                                                                                                                                                                                                                                                                                                                             |
| group 1              | Healthy controls                     | PLOD2, BCAT1, SLC2A1, SLC7A5, DAPP1, NFIL3, G6PD, NAMPT, MTHFD2L, IDI1, PPP1R15A, SLC2A3, SERP1, CFP, GSK3B, CD9, ACSL3, CDKN1A, TXNRD1, HMGCR, GBE1, SLA, ME1, GSR, SLC1A5, UBE2D3, ACTR2, RIT1, SLC6A6, SKAP2, HK2, GLRX, M6PR, RAB1A, P4HA1, IFRD1, MTHFD2, IDH1, PGM1, ACTR3, PDK1, TBK1, PDAP1, GCLC, CTSC, BHLHE40, AK4, STIP1, NFKBIB, ITGB2, ALDOA, PGK1, ELOVL5, SSR1, CXCR4, EGLN3, TFRC, ETF1, CORO1A, PSMC6, VLDLR, DDIT4, GAPDH, SLC7A11, FGL2, TRIB3, PSMA3, TUBA4A, LDHA, YKT6, GLA, NFYC, ADD3, HMBS, COPS5 |
| group 2              | sJIA pretreatment                    |                                                                                                                                                                                                                                                                                                                                                                                                                                                                                                                             |
| Enrichment Score     | 0.44                                 |                                                                                                                                                                                                                                                                                                                                                                                                                                                                                                                             |
| Net Enrichment Score | 1.50                                 |                                                                                                                                                                                                                                                                                                                                                                                                                                                                                                                             |
| nominal p-value      | 1.18E-03                             |                                                                                                                                                                                                                                                                                                                                                                                                                                                                                                                             |
| adjusted p-value     | 2.35E-03                             |                                                                                                                                                                                                                                                                                                                                                                                                                                                                                                                             |
| <b>GEO study ID</b>  | <b>GSE80325</b>                      |                                                                                                                                                                                                                                                                                                                                                                                                                                                                                                                             |
| group 1              | Healthy controls                     | HK2, BCAT1, VLDLR, SLC6A6, RIT1, ALDOA, DDIT4, NFIL3, SLC2A3, IFRD1, NAMPT, ERO1A, TXNRD1, DDIT3, GAPDH, SLA, GBE1, PGM1, HMGCR, GSK3B, IFI30, CXCR4, G6PD, ENO1, P4HA1, TUBA4A, PLOD2, TPI1, GSR, NFYC, RPN1, CORO1A, CD9, BHLHE40, SLC9A3R1, ATP6V1D, CTSC, PPP1R15A, FDXR, ACTR2, SQSTM1, ITGB2, RRM2, MAP2K3, SCD, TBK1, ACSL3, CFP, ELOVL5, TMEM97, LDHA, SKAP2, PGK1, GLRX, SEC11A, UBE2D3, RAB1A, ADIPOR2, LTA4H                                                                                                     |
| group 2              | sJIA pretreatment                    |                                                                                                                                                                                                                                                                                                                                                                                                                                                                                                                             |
| Enrichment Score     | 0.32                                 |                                                                                                                                                                                                                                                                                                                                                                                                                                                                                                                             |
| Net Enrichment Score | 1.43                                 |                                                                                                                                                                                                                                                                                                                                                                                                                                                                                                                             |
| nominal p-value      | 1.07E-02                             |                                                                                                                                                                                                                                                                                                                                                                                                                                                                                                                             |
| adjusted p-value     | 2.44E-02                             |                                                                                                                                                                                                                                                                                                                                                                                                                                                                                                                             |
| <b>GEO study ID</b>  | <b>GSE7753</b>                       |                                                                                                                                                                                                                                                                                                                                                                                                                                                                                                                             |
| group 1              | Healthy controls                     | PLOD2, RRM2, HMBS, SLC7A5, SLC2A1, NFIL3, PPP1R15A, NAMPT, CDKN1A, PSAT1, DHCR24, BUB1, CDC25A, MCM4, SCD, LDLR, SLC2A3, G6PD, TRIB3, ENO1, MCM2, PHGDH, MTHFD2L, ALDOA, BCAT1, SLC1A5, DDIT3, CFP, AURKA, MTHFD2, TFRC, PFKL, PNP, DHCR7, GSR, CCNF, DHFR, SQLE, NMT1, TM7SF2, RRP9, GPI, TPI1, NFKBIB, ATP6V1D, TUBA4A, CD9, PDK1                                                                                                                                                                                         |
| group 2              | active sJIA                          |                                                                                                                                                                                                                                                                                                                                                                                                                                                                                                                             |
| Enrichment Score     | 0.39                                 |                                                                                                                                                                                                                                                                                                                                                                                                                                                                                                                             |
| Net Enrichment Score | 1.53                                 |                                                                                                                                                                                                                                                                                                                                                                                                                                                                                                                             |
| nominal p-value      | 1.34E-03                             |                                                                                                                                                                                                                                                                                                                                                                                                                                                                                                                             |
| adjusted p-value     | 3.59E-03                             |                                                                                                                                                                                                                                                                                                                                                                                                                                                                                                                             |
| <b>GEO study ID</b>  | <b>GSE21521</b>                      |                                                                                                                                                                                                                                                                                                                                                                                                                                                                                                                             |
| group 1              | Healthy controls                     | PLOD2, HMBS, RRM2, SLC2A1, G6PD, SLC7A5, BUB1, PPP1R15A, CDC25A, NFIL3, PSAT1, SLC1A5, CDKN1A, DHCR24, LDLR, NAMPT, MCM2, TRIB3, PHGDH, ALDOA, ENO1, DHCR7, MCM4, CD9, SCD, DDIT3, SLC2A3, RRP9, MTHFD2L, CFP, GPI, TUBG1, TPI1, BCAT1, GSR, PFKL, NMT1, TFRC, TUBA4A, PNP, BHLHE40, TM7SF2, SQSTM1, IDI1, NFKBIB, DDX39A, DHFR                                                                                                                                                                                             |
| group 2              | active sJIA                          |                                                                                                                                                                                                                                                                                                                                                                                                                                                                                                                             |
| Enrichment Score     | 0.47                                 |                                                                                                                                                                                                                                                                                                                                                                                                                                                                                                                             |
| Net Enrichment Score | 1.86                                 |                                                                                                                                                                                                                                                                                                                                                                                                                                                                                                                             |
| nominal p-value      | 1.14E-05                             |                                                                                                                                                                                                                                                                                                                                                                                                                                                                                                                             |
| adjusted p-value     | 4.55E-05                             |                                                                                                                                                                                                                                                                                                                                                                                                                                                                                                                             |

|                      |                   |                                                                                                                                                                                                                                                                                                                                                                                                                                                                                                                                                                                                                                                                                                                                                                                                                                                                                                                                                                              |
|----------------------|-------------------|------------------------------------------------------------------------------------------------------------------------------------------------------------------------------------------------------------------------------------------------------------------------------------------------------------------------------------------------------------------------------------------------------------------------------------------------------------------------------------------------------------------------------------------------------------------------------------------------------------------------------------------------------------------------------------------------------------------------------------------------------------------------------------------------------------------------------------------------------------------------------------------------------------------------------------------------------------------------------|
| <b>GEO study ID</b>  | <b>GSE147608</b>  | UFM1, ITGB2, PSME3, CFP, IFI30, ADD3, LDHA, FADS2, PSMA4, SQSTM1, PSMA3, ATP6V1D, BCAT1, PNP, SLC2A3, PPA1, CYB5B, HSPE1, SORD, BTG2, GMPS, NFYC, GPI, PSMD12, ACLY, HMGCR, ALDOA, GGA2, SLC37A4, HSP90B1, P4HA1, PSMG1, NUP205, SLC9A3R1, HSPD1, ENO1, VLDLR, TRIB3, CACYBP, SC5D, NMT1, CDKN1A                                                                                                                                                                                                                                                                                                                                                                                                                                                                                                                                                                                                                                                                             |
| group 1              | Healthy controls  |                                                                                                                                                                                                                                                                                                                                                                                                                                                                                                                                                                                                                                                                                                                                                                                                                                                                                                                                                                              |
| group 2              | sJIA pretreatment |                                                                                                                                                                                                                                                                                                                                                                                                                                                                                                                                                                                                                                                                                                                                                                                                                                                                                                                                                                              |
| Enrichment Score     | 0.41              |                                                                                                                                                                                                                                                                                                                                                                                                                                                                                                                                                                                                                                                                                                                                                                                                                                                                                                                                                                              |
| Net Enrichment Score | 1.63              |                                                                                                                                                                                                                                                                                                                                                                                                                                                                                                                                                                                                                                                                                                                                                                                                                                                                                                                                                                              |
| nominal p-value      | 3.19E-04          |                                                                                                                                                                                                                                                                                                                                                                                                                                                                                                                                                                                                                                                                                                                                                                                                                                                                                                                                                                              |
| adjusted p-value     | 8.51E-04          |                                                                                                                                                                                                                                                                                                                                                                                                                                                                                                                                                                                                                                                                                                                                                                                                                                                                                                                                                                              |
| <b>GEO study ID</b>  | <b>GSE113645</b>  | LDLR, SLC2A3, BCAT1, PNP, ME1, SLA, NFIL3, PSMD12, IDH1, RIT1, DHCR24, CYP51A1, DHFR, LDHA, IDI1, STARD4, RRM2, PSMA3, EDEM1, SRD5A1, XBP1, ATP6V1D, UBE2D3, ACACA, RAB1A, ETF1, ARPC5L, SQLE, HMGCR, TBK1, COPS5, PSMC2, PSMD14, PDAP1, DDIT4, ADD3, DHCR7, SC5D, NMT1, HPRT1, SLC7A5, G6PD, SLC6A6, ENO1, ALDOA, TFRC, ITGB2, AK4, HMGCS1, UCHL5, PGM1, HSPA5, PSME3, ACTR3, ACSL3, PSMC6, PSMA4, GSR, INSIG1, PGK1, ATP2A2, CYB5B, GSK3B, SKAP2, NFYC, DAPP1, HSPA4, EIF2S2, YKT6, TRIB3, ACTR2, MTHFD2L, PPA1, PRDX1, EEF1E1, ELOVL5, SCD, ACLY, PSMB5                                                                                                                                                                                                                                                                                                                                                                                                                   |
| group 1              | Healthy controls  |                                                                                                                                                                                                                                                                                                                                                                                                                                                                                                                                                                                                                                                                                                                                                                                                                                                                                                                                                                              |
| group 2              | active AOSD       |                                                                                                                                                                                                                                                                                                                                                                                                                                                                                                                                                                                                                                                                                                                                                                                                                                                                                                                                                                              |
| Enrichment Score     | 0.62              |                                                                                                                                                                                                                                                                                                                                                                                                                                                                                                                                                                                                                                                                                                                                                                                                                                                                                                                                                                              |
| Net Enrichment Score | 1.40              |                                                                                                                                                                                                                                                                                                                                                                                                                                                                                                                                                                                                                                                                                                                                                                                                                                                                                                                                                                              |
| nominal p-value      | 7.05E-03          |                                                                                                                                                                                                                                                                                                                                                                                                                                                                                                                                                                                                                                                                                                                                                                                                                                                                                                                                                                              |
| adjusted p-value     | 1.13E-02          |                                                                                                                                                                                                                                                                                                                                                                                                                                                                                                                                                                                                                                                                                                                                                                                                                                                                                                                                                                              |
| <b>GEO study ID</b>  | <b>GSE112057</b>  | NAMPT, RRM2, PLOD2, BUB1, NFIL3, CDC25A, SLC2A3, DAPP1, LTA4H, IDI1, PLK1, HK2, ELOVL5, UBE2D3, IFRD1, SKAP2, RIT1, ACTR2, BCAT1, ACSL3, SLC6A6, GBE1, SCD, MAP2K3, PSAT1, RAB1A, TCEA1, SLA, PDK1, ACTR3, HMGCR, TUBA4A, GLRX, PPP1R15A, GSK3B, POLR3G, MCM4, DHFR, CXCR4, TXNRD1, LDHA, LDLR, TBK1, AURKA, MTHFD2L, IDH1, HMBS, FGL2, TFRC, PGK1, SSR1, ATP6V1D, GAPDH, ADD3, BTG2, ETF1, ITGB2, MTHFD2, PSMC6, DDIT3, DHCR24, SERP1, HPRT1, EDEM1, NFYC, HSPA5, PSMD13, PSMD12, CCNG1, HMGCS1, PITPNB, GLA, AK4, INSIG1, PGM1, PSMA4, GSR, G6PD, MCM2, PHGDH, CDKN1A, SLC7A11, SC5D, EGLN3, IFI30, SQLE, PSME3, PSMA3, CD9                                                                                                                                                                                                                                                                                                                                                |
| group 1              | Healthy controls  |                                                                                                                                                                                                                                                                                                                                                                                                                                                                                                                                                                                                                                                                                                                                                                                                                                                                                                                                                                              |
| group 2              | sJIA              |                                                                                                                                                                                                                                                                                                                                                                                                                                                                                                                                                                                                                                                                                                                                                                                                                                                                                                                                                                              |
| Enrichment Score     | 0.42              |                                                                                                                                                                                                                                                                                                                                                                                                                                                                                                                                                                                                                                                                                                                                                                                                                                                                                                                                                                              |
| Net Enrichment Score | 1.70              |                                                                                                                                                                                                                                                                                                                                                                                                                                                                                                                                                                                                                                                                                                                                                                                                                                                                                                                                                                              |
| nominal p-value      | 4.93E-05          |                                                                                                                                                                                                                                                                                                                                                                                                                                                                                                                                                                                                                                                                                                                                                                                                                                                                                                                                                                              |
| adjusted p-value     | 1.58E-04          |                                                                                                                                                                                                                                                                                                                                                                                                                                                                                                                                                                                                                                                                                                                                                                                                                                                                                                                                                                              |
| <b>GEO study ID</b>  | <b>GSE17590</b>   | SLC2A3, LDHA, PLOD2, LTA4H, ACTR2, GAPDH, DDIT4, NFIL3, ENO1, ALDOA, IFI30, SLC7A5, ACTR3, SLA, ITGB2, GLRX, BCAT1, PGK1, CXCR4, PRDX1, MTHFD2, CORO1A, GCLC, SSR1, CANX, BUB1, SLC1A5, RPN1, ELOVL5, PGM1, PPA1, CDC25A, HK2, XBP1, MCM4, IDI1, ATP6V1D, HSP90B1, GPI, SLC2A1, TPI1, TBK1, G6PD, PPP1R15A, TFRC, UBE2D3, LDLR, CALR, M6PR, SCD, RAB1A, GLA, SERP1, ADD3, GBE1, NFYC, SLC9A3R1, CCNG1, ADIPOR2, FGL2, PHGDH, ACLY, COPS5, GSK3B, PSMD12, TES, MAP2K3, PSMC2, HMGCR, ARPC5L, DAPP1, PSMC6, RRM2, ETF1, PSMA3, EDEM1, SHMT2, PSMA4, GSR, IFRD1, MCM2, RIT1, GMPS, PITPNB, HPRT1, UCHL5, CD9, TXNRD1, IMMT, HSPD1, SDF2L1, PSMB5, INSIG1, CTSC, HSPE1, EBP, HSPA5, BTG2, SLC6A6, RDH11, PDK1, PSMD14, STIP1, TOMM40, PSPH, ATP2A2, CDKN1A, QDPR, UFM1, POLR3G, CTH, EEF1E1, CCNF, PSMD13, PSME3, PDAP1, PSAT1, TRIB3, PSMC4, DHCR7, P4HA1, RPA1, SQSTM1, TM7SF2, TCEA1, IDH1, PLK1, CYP51A1, NUP205, GOT1, CCT6A, HSPA4, SORD, GGA2, ME1, NFKBIB, TUBG1, MLLT11 |
| group 1              | Healthy controls  |                                                                                                                                                                                                                                                                                                                                                                                                                                                                                                                                                                                                                                                                                                                                                                                                                                                                                                                                                                              |
| group 2              | sJIA pretreatment |                                                                                                                                                                                                                                                                                                                                                                                                                                                                                                                                                                                                                                                                                                                                                                                                                                                                                                                                                                              |
| Enrichment Score     | 0.67              |                                                                                                                                                                                                                                                                                                                                                                                                                                                                                                                                                                                                                                                                                                                                                                                                                                                                                                                                                                              |
| Net Enrichment Score | 1.95              |                                                                                                                                                                                                                                                                                                                                                                                                                                                                                                                                                                                                                                                                                                                                                                                                                                                                                                                                                                              |
| nominal p-value      | 1.00E-10          |                                                                                                                                                                                                                                                                                                                                                                                                                                                                                                                                                                                                                                                                                                                                                                                                                                                                                                                                                                              |
| adjusted p-value     | 3.20E-10          |                                                                                                                                                                                                                                                                                                                                                                                                                                                                                                                                                                                                                                                                                                                                                                                                                                                                                                                                                                              |

**Supplementary Table 3. Clinical information for bone marrow pathology studies.**

**Patients with MAS**

| <u>Patient</u> | <u>Age (yr)</u> | <u>Diagnosis</u> | <u>Clinical description</u>                                                                                                                                  |
|----------------|-----------------|------------------|--------------------------------------------------------------------------------------------------------------------------------------------------------------|
| 1              | 14              | sJIA and MAS     | Recurrent fever, rash, arthritis, hypotension, hepatitis, carditis, pancreatitis, cytopenia, ferritin > 8000 ng/mL                                           |
| 2              | 43              | AOSD and MAS     | Recurrent fever, malaise, myalgia, rash, pancytopenia, ferritin > 60,000 ng/mL.                                                                              |
| 3              | 26              | AOSD and MAS     | recurrent fever, rash, arthritis, pulmonary hypertension, renal dysfunction, ferritin > 20,000 ng/ml. Patient succumbed to MAS.                              |
| 4              | 2               | viral MAS        | EBV infection, fever, diarrhea, elevated AST/ALT, hepato-splenomegaly, anemia, leukopenia and ferritin 69,000 ng/mL.                                         |
| 5              | 22              | viral MAS        | EBV infection, fever, GI bleeding, liver failure, ferritin > 60,000 ng/mL. Patient died from multiorgan failure and septic shock.                            |
| 6              | 38              | viral MAS        | EBV infection, history of Crohn's disease, rash, fever, pancytopenia, splenomegaly, and ferritin > 100,000 ng/mL. Patient died from intracranial hemorrhage. |

**Controls with normal bone marrow pathology**

| <u>Patient</u> | <u>Age (yr)</u> | <u>Diagnosis</u>      | <u>Clinical description</u>                                                            |
|----------------|-----------------|-----------------------|----------------------------------------------------------------------------------------|
| 1              | 30              | Anemia                | Anemia and mild leukopenia of unclear etiology                                         |
| 2              | 43              | hypogammaglobulinemia | Low IgG levels of unclear etiology. Family history of common variable immunodeficiency |

**Supplementary Table 4. Antibodies and sources.**

| Target Antigen         | Conjugation  | Clone      | Company        | Catalog #  | Lot #       | Dilution |
|------------------------|--------------|------------|----------------|------------|-------------|----------|
| Ly6C                   | PE/Cy7       | HK1.4      | Biolegend      | 128018     | B295200     | 1:500    |
| Ly6C                   | BV 605       | HK1.4      | Biolegend      | 128036     | B156853     | 1:500    |
| CX3CR1                 | PE           | SA011F11   | Biolegend      | 149006     | B307671     | 1:500    |
| CD11b                  | PB           | M1/70      | Biolegend      | 101224     | B308096     | 1:500    |
| Ly6G                   | APC          | 1A8        | Biolegend      | 127614     | B313371     | 1:500    |
| Ly6G                   | FITC         | 1A8        | Biolegend      | 127606     | B277117     | 1:500    |
| CD3e                   | FITC         | 145-2C11   | Biolegend      | 100306     | B215536     | 1:500    |
| B220                   | FITC         | RA3-6B2    | Biolegend      | 103206     | B230445     | 1:500    |
| CD45.1                 | AF 647       | A20        | Biolegend      | 110720     | B203773     | 1:500    |
| CD45.2                 | PE/Cy7       | 104        | Biolegend      | 109830     | B161541     | 1:500    |
| CD14                   | PE           | M5E2       | Biolegend      | 301850     | B271173     | 1:500    |
| CD14                   | PB           | M5E2       | Biolegend      | 301816     | B257037     | 1:500    |
| CD68                   | AF647        | FA-11      | Biolegend      | 137003     | B253579     | 1:500    |
| CD41                   | FITC         | MWReg30    | Biolegend      | 133904     | B282876     | 1:500    |
| TER-119                | FITC         | TER-119    | Biolegend      | 116206     | B208450     | 1:500    |
| CD117 (c-kit)          | PE/Cy7       | 2B8        | Biolegend      | 105814     | B205421     | 1:500    |
| CD11b                  | FITC         | M1/70      | Biolegend      | 101206     | B160103     | 1:500    |
| CD16/32                | PerCP/Cy5.5  | 93         | Biolegend      | 101324     | B197126     | 1:500    |
| CD115                  | PE           | AFS98      | Biolegend      | 135505     | B256877     | 1:500    |
| CD34                   | PB           | SA376A4    | Biolegend      | 152204     | B171705     | 1:500    |
| CD4                    | PE/Cy7       | GK1.5      | Biolegend      | 100421     | B312815     | 1:500    |
| CD62L                  | FITC         | MEL-14     | Biolegend      | 104405     | B258725     | 1:500    |
| CD44                   | APC          | IM7        | ThermoFisher   | 48-0441-82 | E08502-1631 | 1:500    |
| Phospho-4EBP1 (T37/46) | AF647        | 236B4      | Cell Signaling | 5123S      | 9           | 1:100    |
| Phospho-S6 (S240/244)  | AF488        | D68F8      | Cell Signaling | 5018S      | 6           | 1:100    |
| Phospho-Akt (S473)     | AF488        | D9E        | Cell Signaling | 4071S      | 11          | 1:100    |
| CD45R (B220)           | FITC         | RA3-6B2    | ThermoFisher   | 13-0452-85 | E02531-301  | 1:100    |
| TSC2                   | unconjugated | D93F12     | Cell Signaling | 4308T      | 6           | 1:1000   |
| β-actin                | unconjugated | 2F1-1      | Biolegend      | 643802     | B177370     | 1:2000   |
| anti-mouse IgG         | HRP          | polyclonal | Cell Signaling | 7076S      | 35          | 1:2500   |
| anti-rabbit IgG        | HRP          | polyclonal | Cell Signaling | 7074P2     | 30          | 1:2500   |

**Supplementary Table 5. Gene sets and sources for gene set enrichment analysis.**

| Gene set                  | Source <sup>9-11</sup> |
|---------------------------|------------------------|
| HEDGEHOG_SIGNALING        | Hallmark gene sets     |
| IFN- $\gamma$ _RESPONSE   | Hallmark gene sets     |
| IL2/STAT5_SIGNALING       | Hallmark gene sets     |
| IL6/STAT3_SIGNALING       | Hallmark gene sets     |
| MTORC1_SIGNALING          | Hallmark gene sets     |
| MYC_TARGETS_V2            | Hallmark gene sets     |
| NOTCH_SIGNALING           | Hallmark gene sets     |
| TGF $\beta$ _SIGNALING    | Hallmark gene sets     |
| TNFA_SIGNALING_VIA_NFKB   | Hallmark gene sets     |
| UNFOLDED_PROTEIN_RESPONSE | Hallmark gene sets     |
| WNT/ $\beta$ _SIGNALING   | Hallmark gene sets     |
| IL1_SIGNALING             | Reactome Pathway       |
| IL10_SIGNALING            | Reactome Pathway       |
| IL17_SIGNALING            | Reactome Pathway       |
| IL7_SIGNALING             | Reactome Pathway       |
| IL18_SIGNALING            | WikiPathways           |

## Supplementary Figure 1

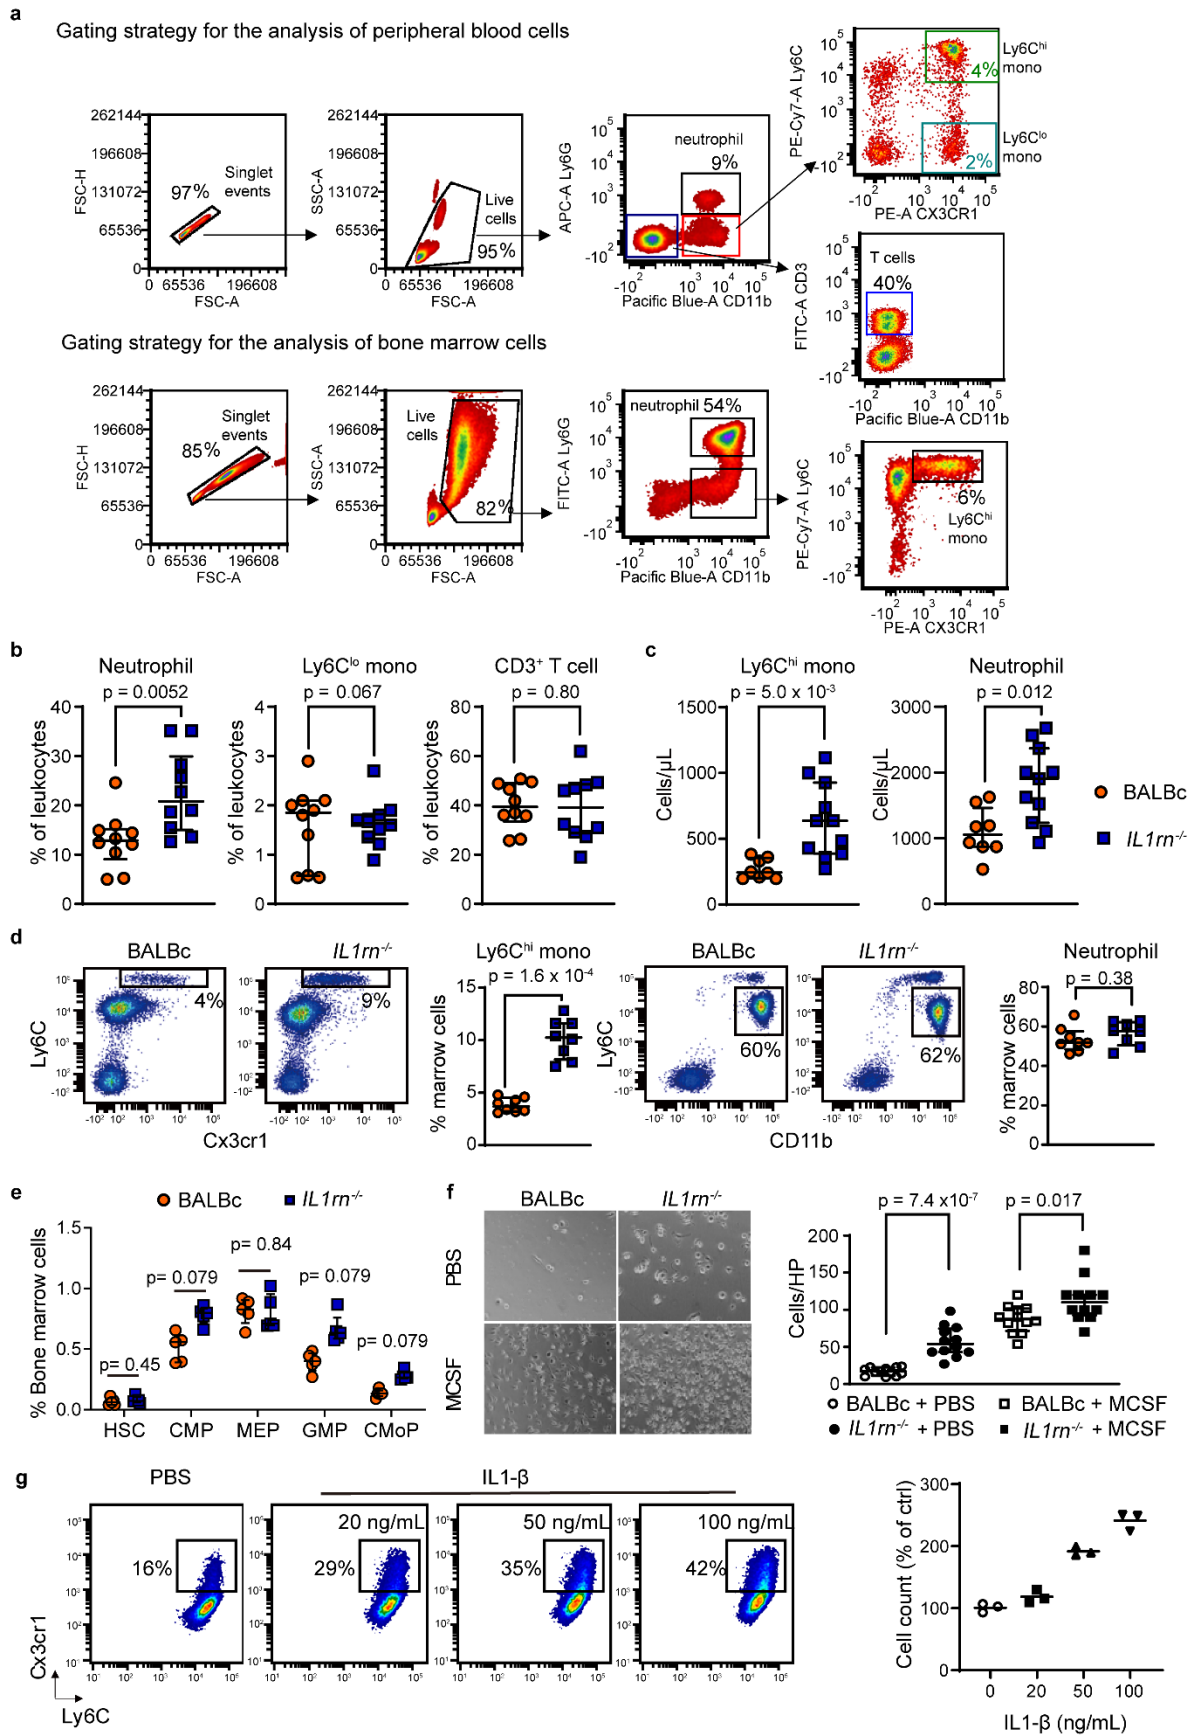

**Supplementary Figure 1. Enhanced myeloid cell differentiation in IL1rn<sup>-/-</sup> mice.** a) Gating strategy for flow cytometry analysis of peripheral blood cells and bone marrow cells. Percentages represent the percentage of gated events in live cells. b) Relative (n= 10 per group) and c) absolute count of cell subsets in peripheral blood of BALBc and IL1rn<sup>-/-</sup> mice (BALBc, n = 8, IL1rn<sup>-/-</sup> n = 11). d) Representative flow cytometry plot and quantification of bone marrow myeloid cell subsets in BALBc and IL1rn<sup>-/-</sup> mice (n = 8 per group). Boxes on left panels indicate Ly6C<sup>hi</sup> monocytes and boxes on right panels indicate neutrophils. e) Quantification of hematopoietic stem cell (HSC), common myeloid progenitors (CMP), granulocyte-monocyte progenitors (GMP) and common monocyte progenitors (CMoP) in BALBc and IL1rn<sup>-/-</sup> mice (n = 5 per group). f) Representative photo (50x magnification) and quantification of adherent macrophages derived from cultured bone marrow cells in the presence or absence of M-CSF (3 high power fields at 100x magnification counted per sample; n = 4 mice per group). g) Expansion of ER-Hoxb8 myeloid progenitor cells in the presence of IL-1 $\beta$  (n = 3 per condition). Boxes indicate Ly6C<sup>hi</sup> monocytes. Mice were 6-7 weeks old for all experiments and data in panels b-e were pooled from 2-3 independent experiments. Statistical analyses (all two-sided): Mann-Whitney U test (panels b-f). Median and error bars representing interquartile range are displayed in panels b-g Source data are provided as a Source Data file.



## Supplementary Figure 2

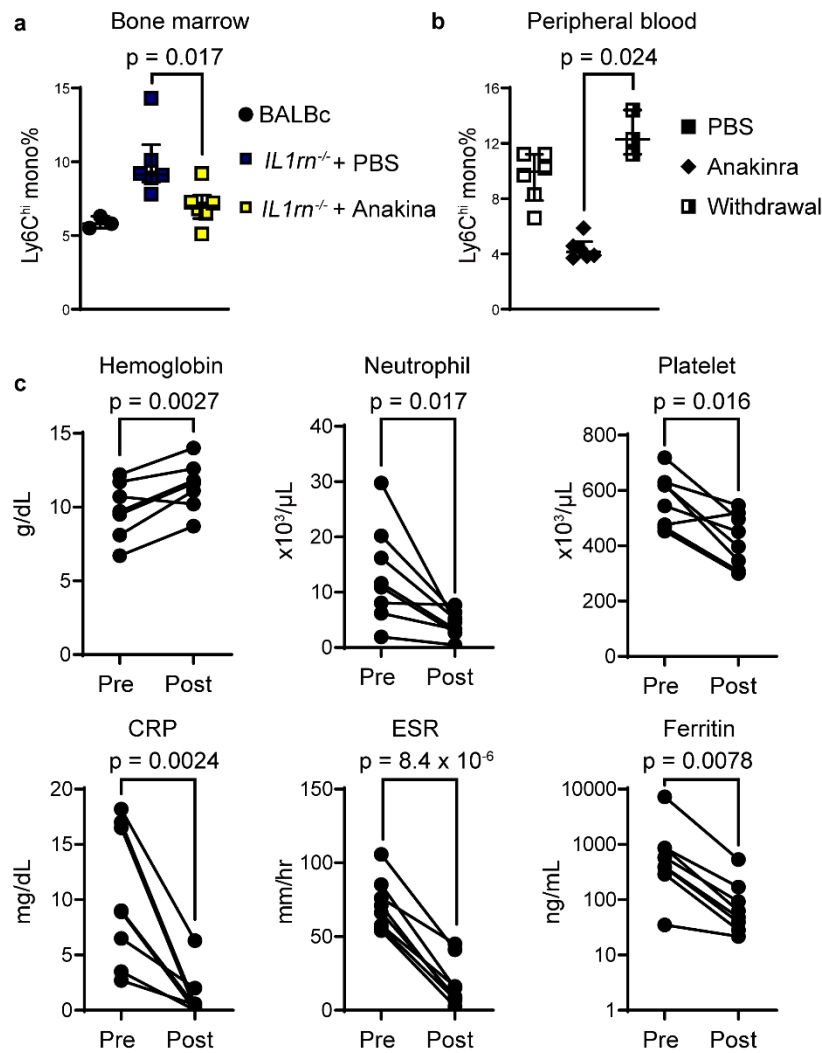

**Supplementary Figure 2. Anakinra treatment reverses inflammation and monocyte expansion.** a) Quantification of bone marrow Ly6C<sup>hi</sup> monocytes in WT BALBc mice ( $n = 3$ ) and IL1rn<sup>-/-</sup> mice treated with PBS ( $n = 6$ ) or anakinra ( $n = 6$ ; 10 mg/kg i.p. daily for 2 weeks). b) Quantification of peripheral blood Ly6C<sup>hi</sup> monocytes in IL1rn<sup>-/-</sup> mice treated with PBS or anakinra for 2 weeks ( $n = 6$  per group). Additional data were collected from the anakinra group 1 week after treatment discontinuation ( $n = 3$ ). Mice were 8 weeks old for all experiments. Data in panels a and b were pooled from 2 independent experiments. c) Complete blood count and inflammatory marker measurements in sJIA patients pre-treatment and 2 weeks after initiation of anakinra ( $n = 8$ ). Statistical analyses (all two-sided): Mann-Whitney U test (panel a,b); Wilcoxon signed-rank test (panel b). Median and error bars representing interquartile range are displayed in panels a,b. Source data are provided as a Source Data file.

## Supplementary Figure 3

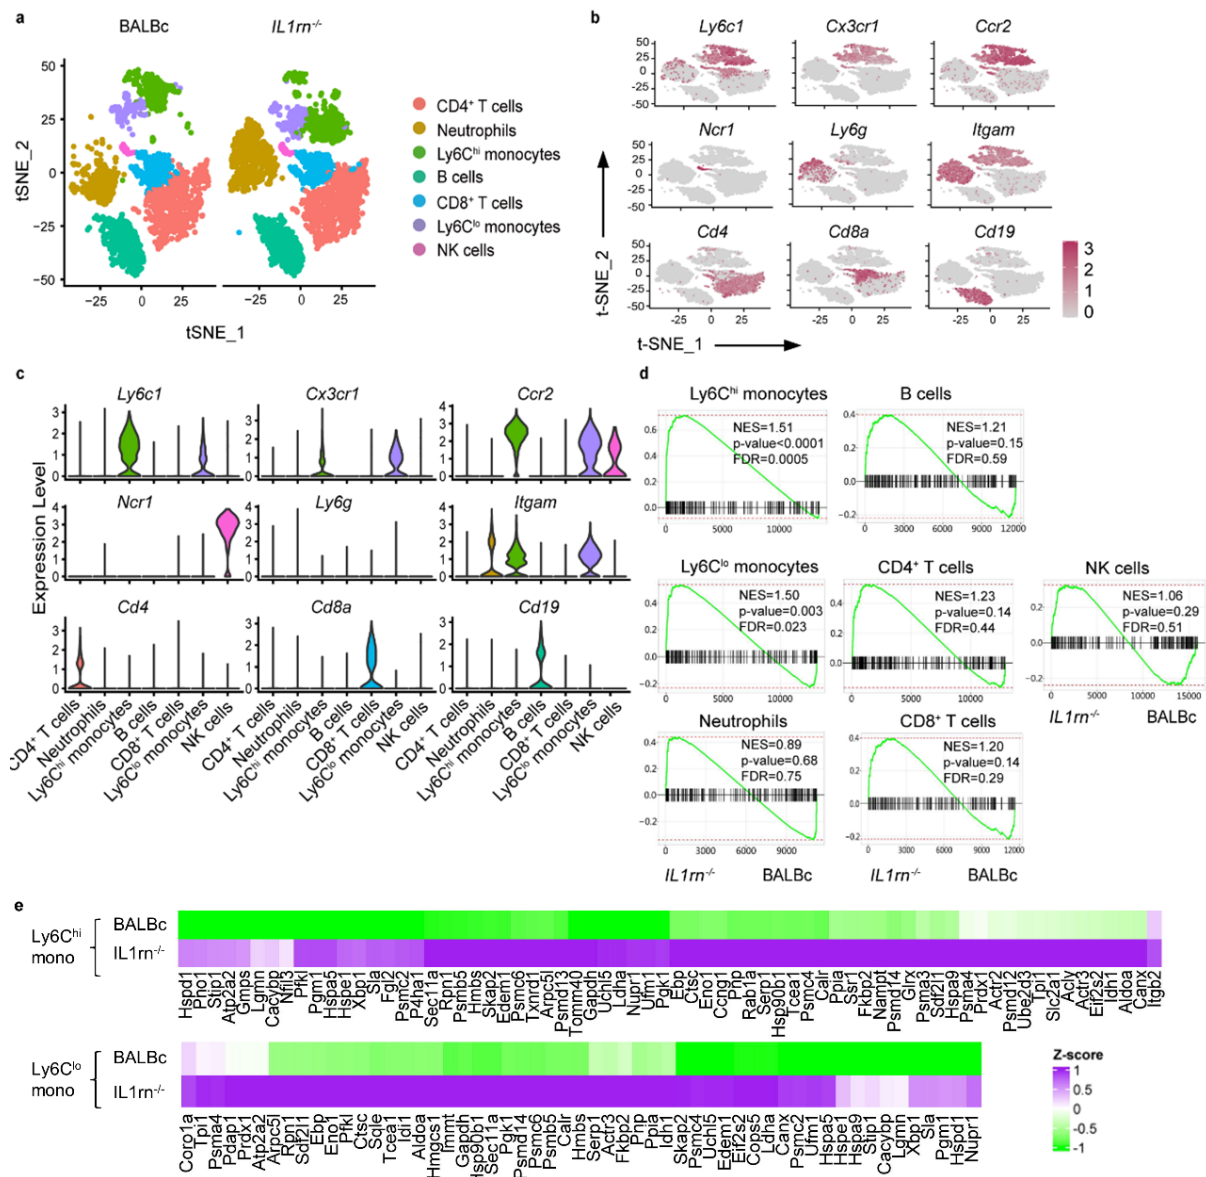

## Supplementary Figure 4

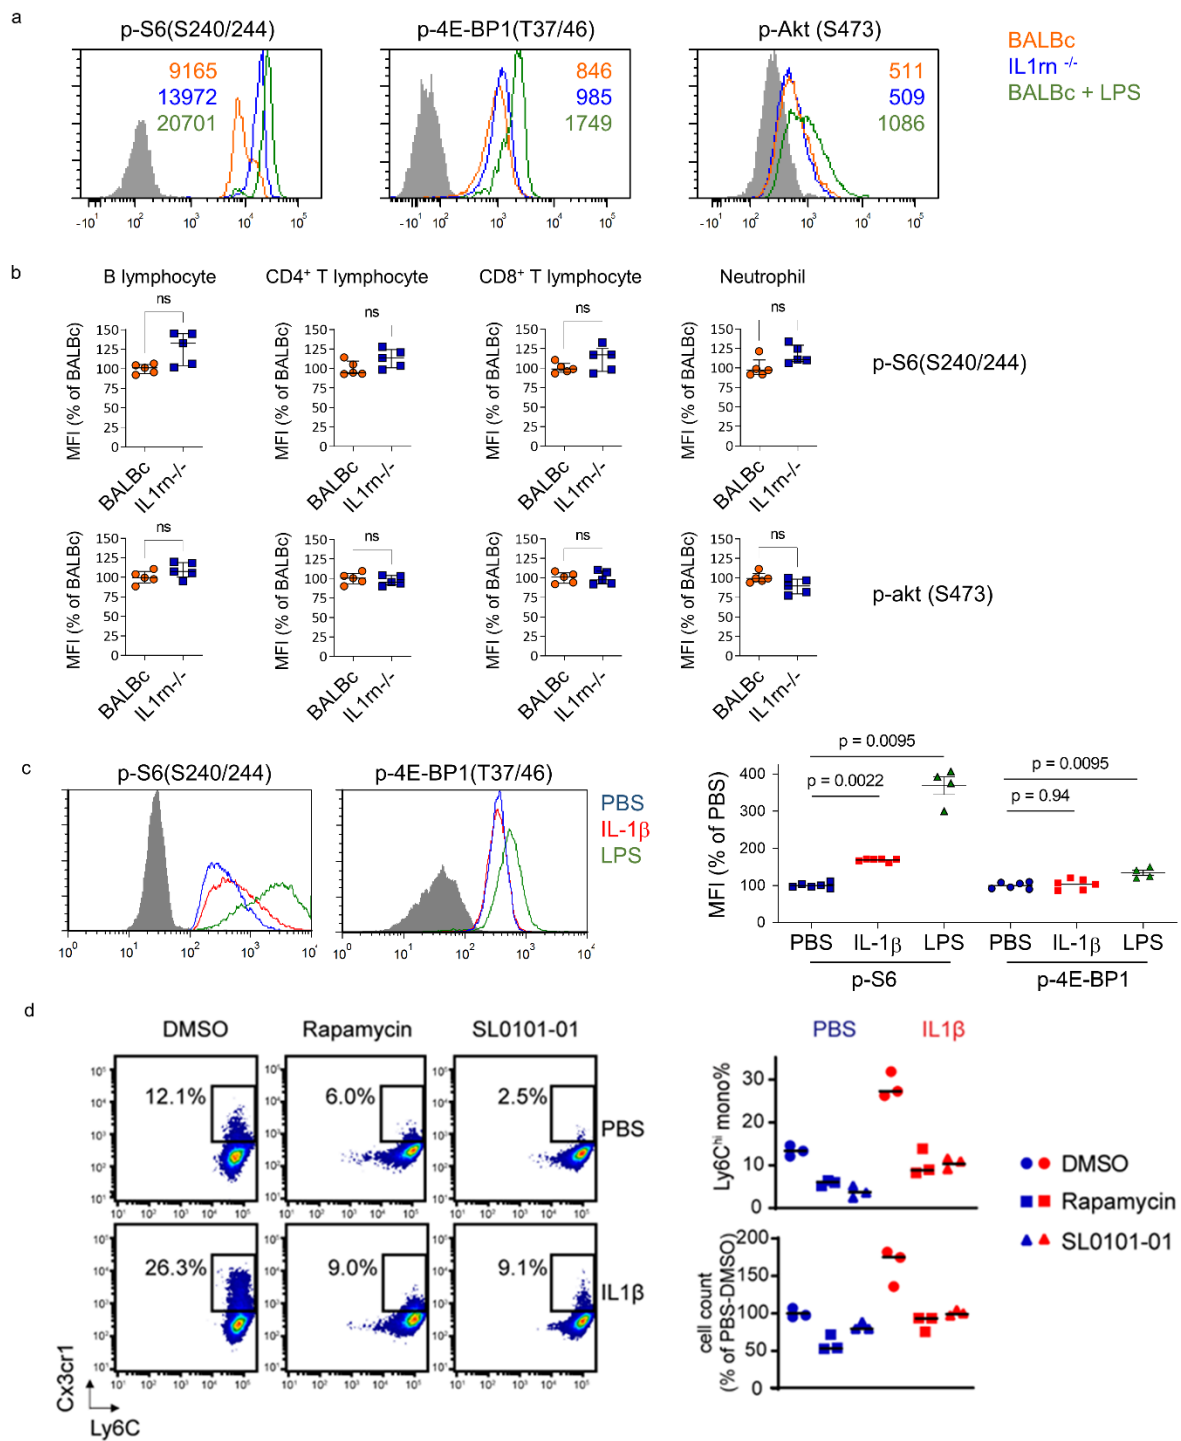

**Supplementary Figure 4. mTORC1 mediates the inflammatory effects of IL-1 signaling.** a) Phospho-flow analysis of mTOR substrates in bone marrow Ly6C<sup>hi</sup> monocytes from WT and IL1rn<sup>-/-</sup> mice at baseline. Gray shades represent isotype control. Ex-vivo stimulation with lipopolysaccharide (100 ng/mL; 1 hr) was used as a positive control. b) phospho-flow analysis of S6 (S240/244) and Akt (S473) in bone marrow neutrophils and lymphocyte subsets from IL1rn<sup>-/-</sup> mice and WT BALB/c mice (n = 5 per group). c) Phospho-flow quantification of phosphorylated S6 (S240/244) and 4EBP1 (T37/46) in ER-Hoxb8 cells differentiated in the presence of IL-1 $\beta$  (50 ng/mL) or LPS (100 ng/mL). Mean fluorescence intensity was normalized to the mean of the PBS group. d) Flow cytometry plots and quantification of Ly6C<sup>hi</sup> monocyte development from ER-Hoxb8 cells (box) treated with PBS or IL-1 $\beta$ , and in the presence of DMSO, rapamycin (500 nM) or SL0101-01 (10 nM; n = 3 per group). Mice were 8-9 weeks old for all experiments. Panels b and c are pooled from 2 independent experiments. Statistical analyses (all two-sided): Mann-Whitney U test (panels b and c). Median and error bars representing interquartile range are displayed in panels b-c. Source data are provided as a Source Data file.

## Supplementary Figure 5

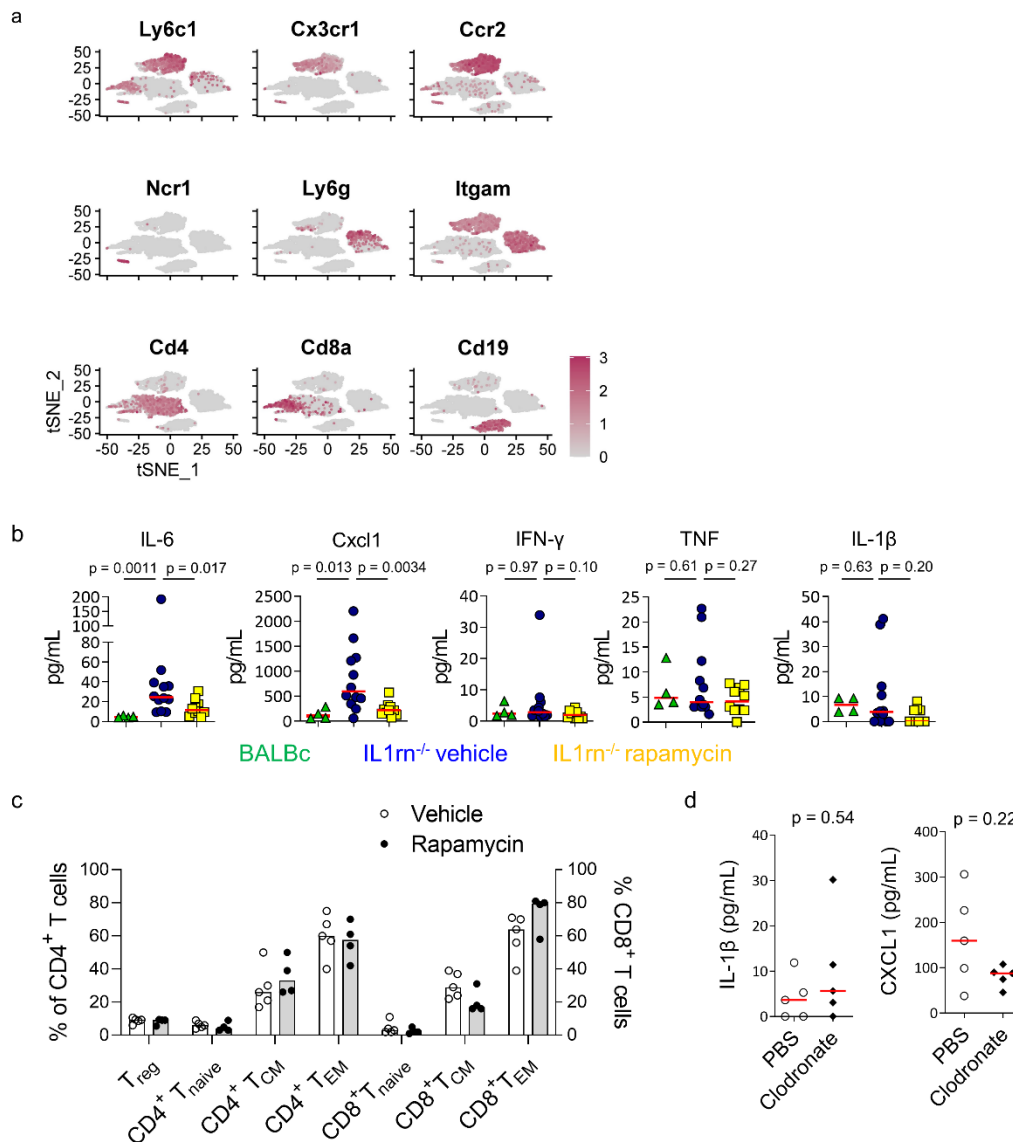

**Supplementary Figure 5. mTOR inhibition and phagocyte depletion modulate the inflammatory signature in *IL1rn<sup>-/-</sup>* mice.** a) t-SNE feature plots of single-cell RNA-seq data illustrating the expression of lineage defining cellular markers. b) Plasma cytokine / chemokine levels in BALBc mice and *IL1rn<sup>-/-</sup>* mice treated with rapamycin or vehicle control for 10 weeks (BALBc, n = 4; Vehicle, n = 12; Rapamycin, n = 10). c) Enumeration of naïve T cells ( $CD62L^+ CD44^{lo}$ ), central memory T cells ( $T_{CM}$ ;  $CD62L^+ CD44^+$ ), effector memory T cells ( $T_{EM}$ ;  $CD62L^{lo} CD44^+$ ), and regulatory T cells ( $T_{reg}$ ;  $CD4^+ CD25^+ Foxp3^+$ ) in the spleen of *IL1rn<sup>-/-</sup>* mice treated with rapamycin or vehicle control (n = 5 per group). d) Quantification of plasma IL-1 $\beta$  and CXCL1 levels in mice treated with PBS-liposomes or clodronate-liposomes for 6 weeks (n = 5 per group). Mice were 8 weeks old for the experiment in panel a, 4 weeks old for the experiments in panels b, c, and 6 weeks old for experiments in panel d. Data in panels b were pooled from 2 independent experiments. Statistical analyses (all two-sided): Mann-Whitney U test (panels b, c and d). Median and error bars representing interquartile range are displayed in panel b. Bars in panel c and lines in panel d represent the median. Source data are provided as a Source Data file.

## Supplementary Figure 6

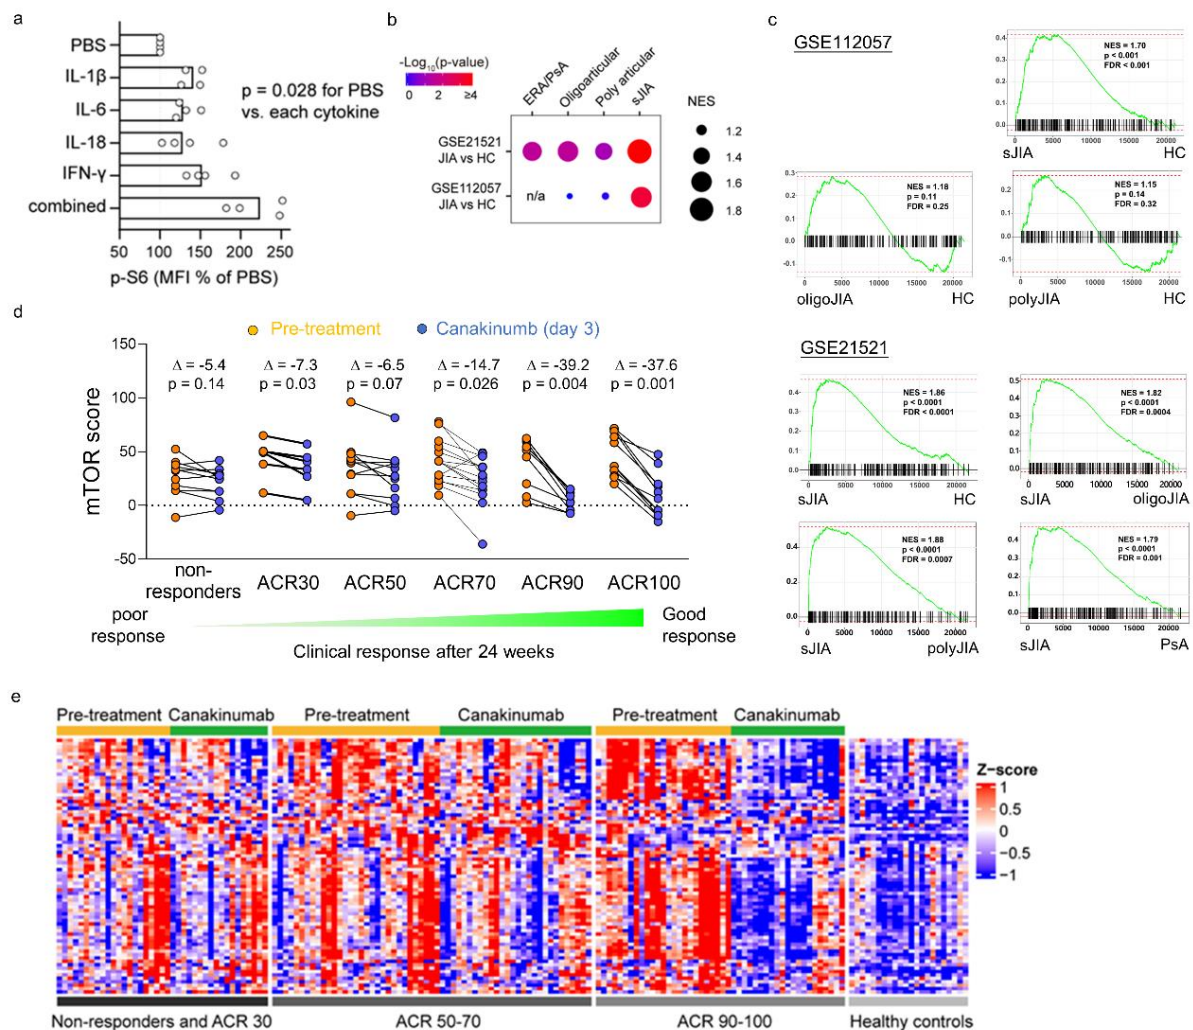

**Supplementary Figure 6. mTORC1 transcriptomic signature in patients with SD.** a) Phospho-flow quantitation of phosphorylated S6 (S240/244) and 4E-BP1 (T37/46) expression in human monocytes stimulated with proinflammatory cytokines individually or in combination. Data are normalized to MFI of PBS-treated cells. b) Cluster plot and c) GSEA plots of Hallmark mTORC1 gene set enrichment in patients with JIA subtypes relative to healthy controls (data source: GSE21521 and GSE112057). HC, healthy controls; PsA, psoriatic arthritis. d) Comparison of mTORC1 gene score changes after initiation of canakinumab (Day 3 minus baseline) and clinical response after 24 weeks (data source: GSE80060). e) Heatmap of leading-edge genes in the Hallmark mTORC1 gene set before treatment and 3 days after canakinumab treatment grouped by American College of Rheumatology clinical response after 24 weeks (data source: GSE80060). Statistical analyses (all two-sided): Mann-Whitney U test (panel a); permutation test (panel b,c), Wilcoxon signed-rank test (panel d). Bars in panel a represent the median. Source data are provided as a Source Data file.



## Supplementary Figure 7

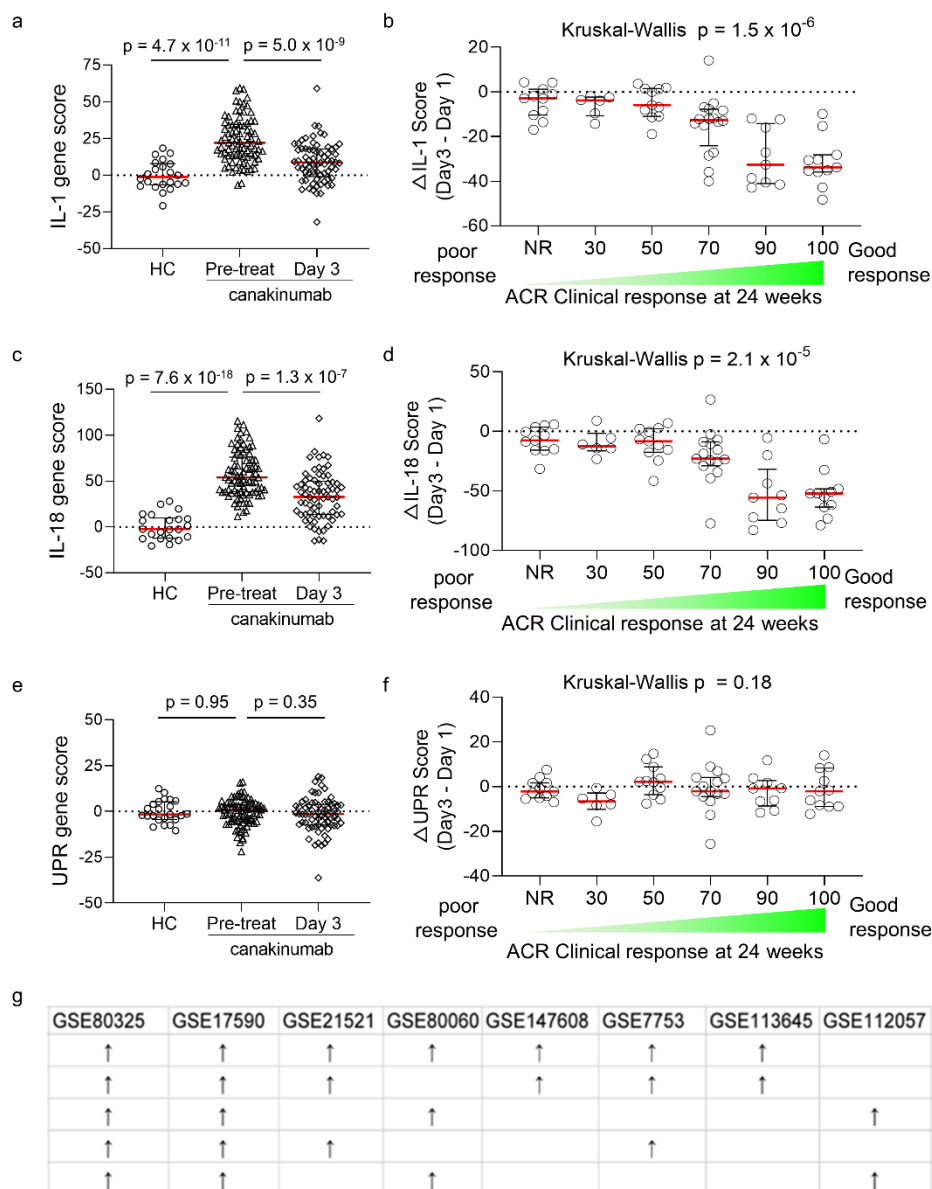

### Supplementary Figure 7. Transcriptomic and proteomic signatures of SD in published datasets.

a-b) Expression of IL-1 signaling, (c-d) IL-18 signaling and (e-f) unfolded protein response gene sets in healthy controls (n = 22), sJIA patients at baseline (n = 82) and sJIA patients (n = 69) before treatment and 3 days after canakinumab treatment, and correlations with clinical response after 24 weeks (data source: GSE80060). Clinical response in b, d and f was stratified according to American College of Rheumatology (ACR) score: ACR 0 / Non-responders (NR, n = 10), ACR30 (n = 6), ACR50 (n = 11), ACR70 (n = 16), ACR90 (n = 8), ACR100 (n = 11). A standardized composite gene score for each pathway was calculated from the expression of leading-edge genes (comparing healthy controls and SD). g) Expression of genes encoding key glycolytic enzymes in patients with SD across different transcriptomic studies. Arrows indicate increased expression compared to controls from the same study ( $p < 0.05$ ). Statistical analyses (all two-sided): Mann-Whitney U test (panels a, c, e and g); Kruskal-Wallis test (panel b, d and f). Median and error bars representing interquartile range are displayed in panels a-f. Source data are provided as a Source Data file.

## Supplementary Figure 8

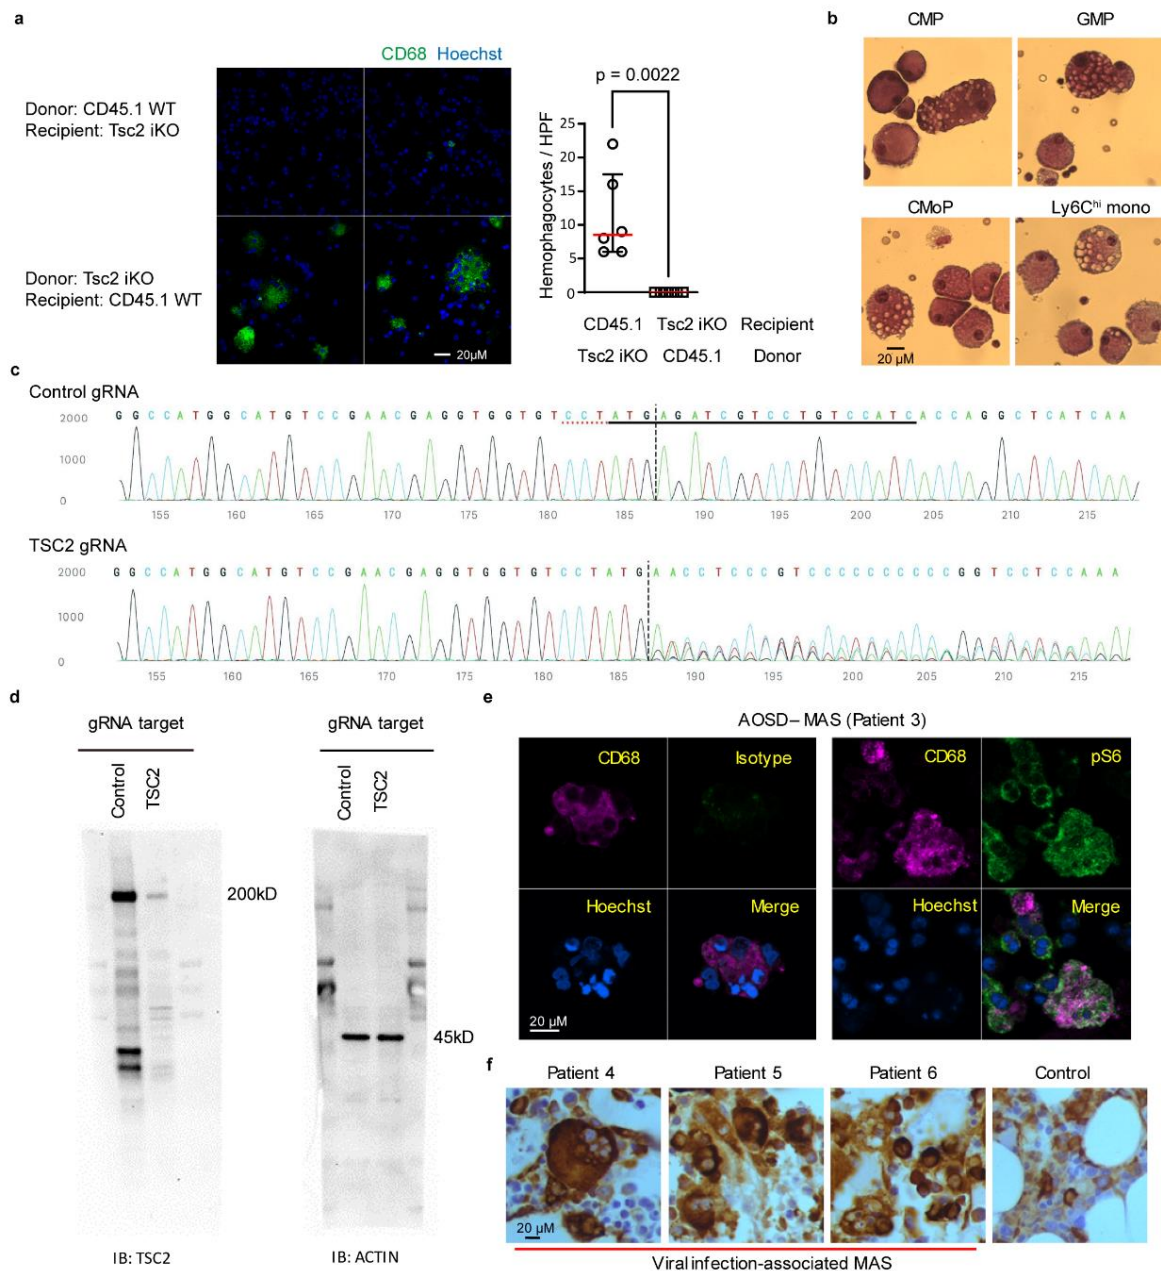

### Supplementary Figure 8. Aberrant mTORC1 activation as a driver of hemophagocytosis.

a) Representative confocal microscopy image and quantification of hemophagocytes in Tsc2 iKO mice transplanted with WT bone marrow and in WT mice transplanted with Tsc2 iKO bone marrow. Two high power fields (100x) were counted for each animal (n = 3 per group). Scalebar denotes 20  $\mu$ M. Donor and recipient mice were 8 weeks old. b) Wright-Giemsa staining of sorted myeloid cell progenitors or monocytes from Ubiquitin-ERT2-Cre Tsc2 <sup>fl/fl</sup> mice cultured in the presence of 4OH-tamoxifen, SCF and M-CSF for 12 days and cocultured with erythrocytes for 24 hours. CMP, common myeloid progenitor; GMP, granulocyte-monocyte progenitor; CMoP, common monocyte progenitor. c) Sanger sequencing of monocytes electroporated with ribonuclear complex containing Cas9 and TSC2 guide RNA or control gRNA. Black line indicates gRNA sequence, red dotted line indicates protospacer adjacent motif and vertical black dotted line denotes predicted cleavage site with TSC2 gRNA. d) immunoblot of TSC2 and



beta-actin in human monocytes treated with TSC2-gRNA or control gRNA. Expected molecular weight for TSC2 (200 kD) and actin (45 kD) are indicated. Outside lanes were loaded with protein standards. e) Confocal microscopy of phospho S6 (S240/244) and isotype staining in hemophagocytes from a patient with fulminant AOSD. Scalebar denotes 20  $\mu$ M. f) Immunohistochemistry of phospho-S6 (S240/244) in bone marrow section from patients with viral infection-associated MAS. Images in panels b, d are representative of 2 independent experiments. Images in panel e, f are derived from one experiment. Statistical analyses (all two-sided): Mann-Whitney U test (panel a). Median and error bars representing interquartile range are displayed in panel a. Source data are provided as a Source Data file.

## Supplementary References

- 1 Cepika, A. M. *et al.* A multidimensional blood stimulation assay reveals immune alterations underlying systemic juvenile idiopathic arthritis. *J Exp Med* **214**, 3449-3466, doi:10.1084/jem.20170412 (2017).
- 2 Quartier, P. *et al.* A multicentre, randomised, double-blind, placebo-controlled trial with the interleukin-1 receptor antagonist anakinra in patients with systemic-onset juvenile idiopathic arthritis (ANAJIS trial). *Annals of the rheumatic diseases* **70**, 747-754, doi:10.1136/ard.2010.134254 (2011).
- 3 Ruperto, N. *et al.* Two randomized trials of canakinumab in systemic juvenile idiopathic arthritis. *The New England journal of medicine* **367**, 2396-2406, doi:10.1056/NEJMoa1205099 (2012).
- 4 Fall, N. *et al.* Gene expression profiling of peripheral blood from patients with untreated new-onset systemic juvenile idiopathic arthritis reveals molecular heterogeneity that may predict macrophage activation syndrome. *Arthritis and rheumatism* **56**, 3793-3804, doi:10.1002/art.22981 (2007).
- 5 Schulert, G. S. *et al.* Monocyte and bone marrow macrophage transcriptional phenotypes in systemic juvenile idiopathic arthritis reveal TRIM8 as a mediator of IFN-gamma hyper-responsiveness and risk for macrophage activation syndrome. *Annals of the rheumatic diseases*, doi:10.1136/annrheumdis-2020-217470 (2020).
- 6 Mo, A. *et al.* Disease-specific regulation of gene expression in a comparative analysis of juvenile idiopathic arthritis and inflammatory bowel disease. *Genome Med* **10**, 48, doi:10.1186/s13073-018-0558-x (2018).
- 7 Segawa, S. *et al.* Placenta Specific 8 Suppresses IL-18 Production through Regulation of Autophagy and Is Associated with Adult Still Disease. *J Immunol* **201**, 3534-3545, doi:10.4049/jimmunol.1800667 (2018).
- 8 Hinze, C. H. *et al.* Immature cell populations and an erythropoiesis gene-expression signature in systemic juvenile idiopathic arthritis: implications for pathogenesis. *Arthritis research & therapy* **12**, R123, doi:10.1186/ar3061 (2010).
- 9 Jassal, B. *et al.* The reactome pathway knowledgebase. *Nucleic Acids Res* **48**, D498-D503, doi:10.1093/nar/gkz1031 (2020).
- 10 Kelder, T. *et al.* Mining biological pathways using WikiPathways web services. *PLoS One* **4**, e6447, doi:10.1371/journal.pone.0006447 (2009).
- 11 Liberzon, A. *et al.* The Molecular Signatures Database (MSigDB) hallmark gene set collection. *Cell systems* **1**, 417-425, doi:10.1016/j.cels.2015.12.004 (2015).
